# Supplementary material for: Combining prior knowledge with input selection algorithms for quantitative analysis using neural networks in laser induced breakdown spectroscopy
Source: Royal Society of Chemistry journal article supplement (doi:10.1039/d0ay02300k), 2021-01-01
Supplement: d0ay02300k1.pdf [file d0ay02300k1.pdf]

# Combining prior knowledge with input selection algorithms for quantitative analysis by neural network in laser induced breakdown spectroscopy: Supplementary Materials

Danny Luarte, Ashwin Kumar Myakalwar, Marizu Velasquez, Jonnathan Alvarez, Claudio Sandoval, Rodrigo Fuentes, Jorge Yanez, and Daniel Sbarbaro

## List of Figures

|    |                                                                                                                                                                                         |   |
|----|-----------------------------------------------------------------------------------------------------------------------------------------------------------------------------------------|---|
| S1 | Scores obtained using the KBest algorithm. The selection of a particular wavelength depends on the higher number of scores and correlated with the LIBS library data(enlarged picture). | 2 |
| S2 | Cumulative variance explained using number of principal components. A total of 8 principal components explain 99% of the variance cumulatively . . . . .                                | 2 |
| S3 | Loadings plot of principal component analysis . . . . .                                                                                                                                 | 3 |
| S4 | Sum of weights obtained using CARS method . . . . .                                                                                                                                     | 3 |
| S5 | Sum of weights obtained using the LASSO regularization method . . . . .                                                                                                                 | 4 |

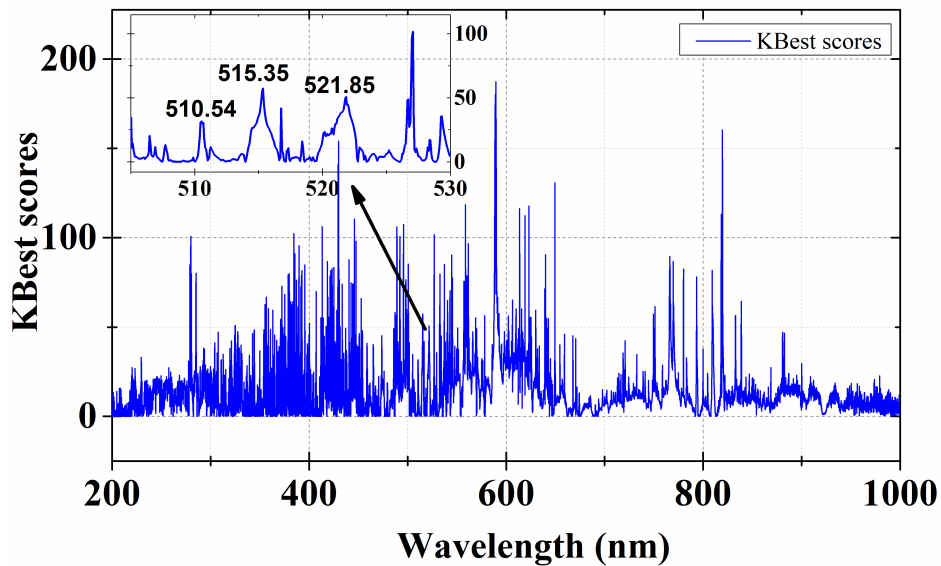

Figure S1: Scores obtained using the KBest algorithm. The selection of a particular wavelength depends on the higher number of scores and correlated with the LIBS library data(enlarged picture).

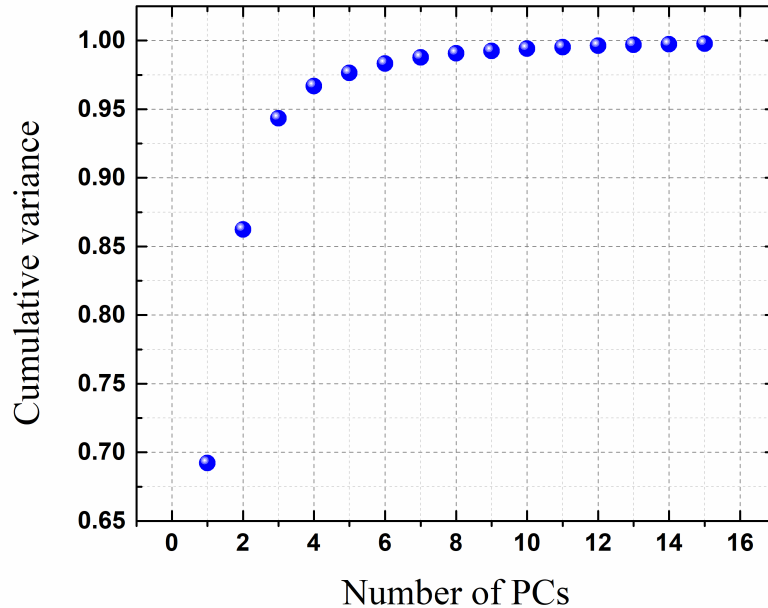

Figure S2: Cumulative variance explained using number of principal components. A total of 8 principal components explain 99% of the variance cumulatively

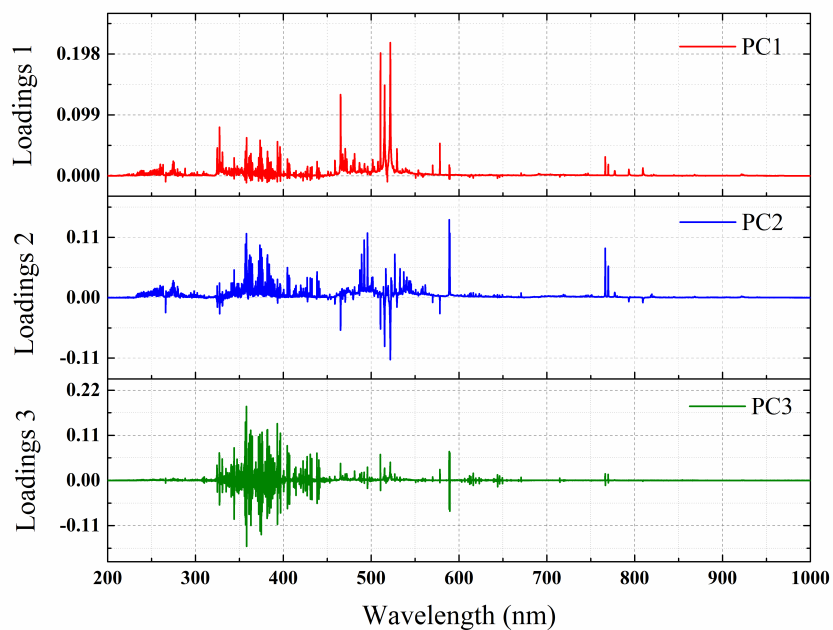

Figure S3: Loadings plot of principal component analysis

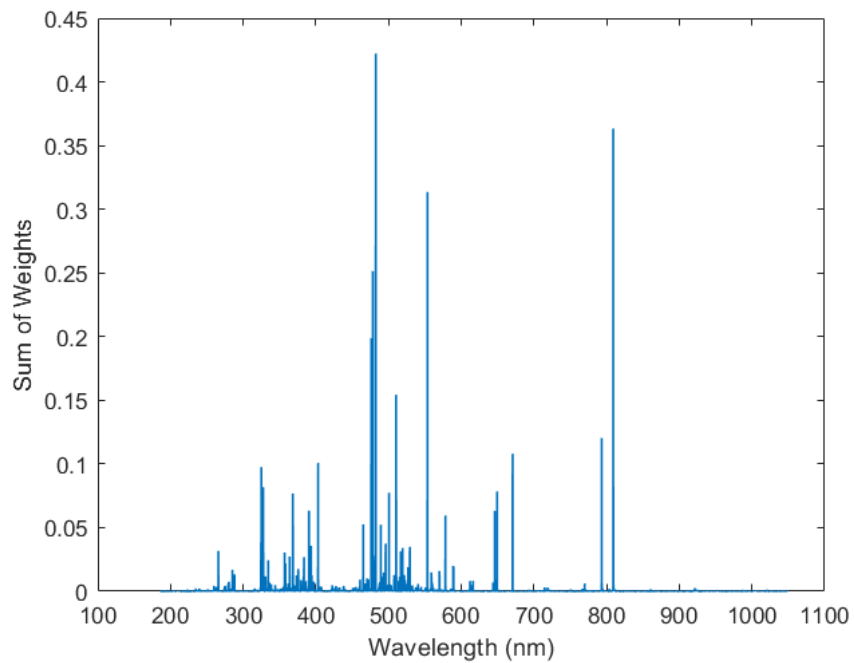

Figure S4: Sum of weights obtained using CARS method

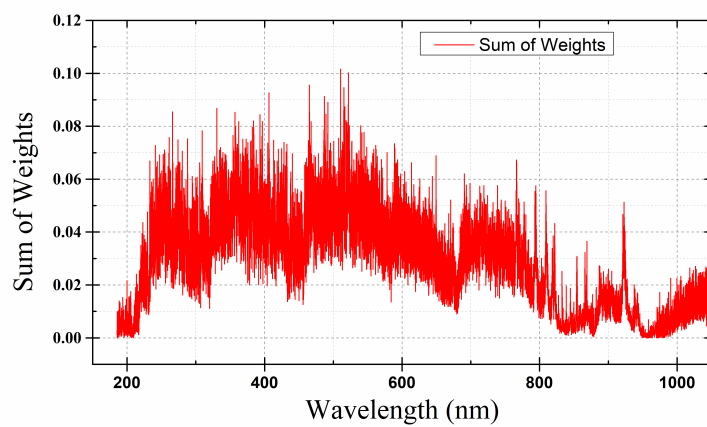

Figure S5: Sum of weights obtained using the LASSO regularization method
